# Supplementary material for: Prevalence and Genotyping of Water- and Food-Borne Parasitic Protozoans (Giardia duodenalis and Cryptosporidium spp.) in Hospitalized Patients from Northwestern Romania
Source: MDPI journal article supplement (doi:10.3390/microorganisms12040762), 2024-04-10
Supplement: s1 [file s1]

## QUESTIONNAIRE

**Name** \_\_\_\_\_

**Personal Numeric Code**

**Phone** \_\_\_\_\_

☐ *I am the participant*

☐ *I am the parent or guardian of the participant*

**Occupation** \_\_\_\_\_

**International travelling during the past year?**

☐ no    ☐ yes    where ? \_\_\_\_\_

**Persons in the household** \_\_\_\_\_, of which children \_\_\_\_\_

**Children in collectivity (kindergarten, school, etc.)** ☐ no    ☐ yes

**Professional or recreational outdoor activities?**

☐ daily    ☐ weekly    ☐ rarely    ☐ never

**Household**    ☐ city    ☐ village    ☐ mixed

☐ apartment    ☐ house

**If living in a house, the sewage system is** ☐ centralized    ☐ own, uncentralized

Main source of drinking water:

☐ tap water    ☐ bottled    ☐ other sources (well/spring)

Consumption of raw milk?

☐ no    ☐ yes

Consumption of raw or undercooked (rare) meat?

☐ no    ☐ yes

Consumption of raw or smoked meat products (sausages, pastrami, etc.)?

☐ no    ☐ yes

Consumption of unwashed fruits and vegetables?

☐ no    ☐ sometimes    ☐ frequently    ☐ almost always

Washing hands before a meal?

☐ no    ☐ sometimes    ☐ frequently    ☐ almost always

Owning the following animals?

|                             | No | Yes | Indoor access |
|-----------------------------|----|-----|---------------|
| Dog(s)                      |    |     |               |
| Cat(s)                      |    |     |               |
| Hamster(s)                  |    |     |               |
| Fish                        |    |     |               |
| Turtle(s) or other reptiles |    |     |               |
| Cage bird(s)                |    |     |               |
| Rabbit(s)                   |    |     |               |
| Cow(s)                      |    |     |               |
| Horse(s)                    |    |     |               |
| Sheep                       |    |     |               |
| Goat(s)                     |    |     |               |
| Poultry                     |    |     |               |
| Others?                     |    |     |               |

Have you ever been diagnosed with a parasitic disease?

☐ no ☐ yes, which? \_\_\_\_\_

Were you prescribed or did you take antiparasitic medication?

☐ no ☐ yes, which product/substance? \_\_\_\_\_

Any recent contact with persons having parasitic diseases?

☐ no ☐ yes ☐ I don't know

Do you have one or more of the following symptoms for no apparent reason? (check all that apply)

|                                 | No<br>(0) | Yes                                  |                           |                            |                                  |
|---------------------------------|-----------|--------------------------------------|---------------------------|----------------------------|----------------------------------|
|                                 |           | Sometimes (1)<br>(less than 1/month) | Rarely (2)<br>(1-2/month) | Frequently (3)<br>(1/week) | Very frequently (4)<br>(>1/week) |
| Bloating                        |           |                                      |                           |                            |                                  |
| Loss of appetite                |           |                                      |                           |                            |                                  |
| Nausea                          |           |                                      |                           |                            |                                  |
| Vomiting                        |           |                                      |                           |                            |                                  |
| Abdominal pain<br>and/or cramps |           |                                      |                           |                            |                                  |
| Constipation                    |           |                                      |                           |                            |                                  |
| Diarrhea                        |           |                                      |                           |                            |                                  |
| Weight loss                     |           |                                      |                           |                            |                                  |
| Fever                           |           |                                      |                           |                            |                                  |
| Fatigue                         |           |                                      |                           |                            |                                  |
| Headaches                       |           |                                      |                           |                            |                                  |
| Dizziness                       |           |                                      |                           |                            |                                  |
| Muscle pain                     |           |                                      |                           |                            |                                  |
| Joint pain                      |           |                                      |                           |                            |                                  |
| Coughing                        |           |                                      |                           |                            |                                  |
| Nettle rash                     |           |                                      |                           |                            |                                  |
| Others:                         |           |                                      |                           |                            |                                  |
|                                 |           |                                      |                           |                            |                                  |
|                                 |           |                                      |                           |                            |                                  |

Signature

Date

\_\_\_\_\_

\_\_\_\_\_
